1 **Title: Methane Reduction Potential of Two Pacific Coast Macroalgae During *in-vitro***  
2 **Ruminant Fermentation.**

3 Charles G. Brooke<sup>a</sup> (cgbrooke@ucdavis.edu), Breanna M. Roque<sup>a</sup> (bmroque@ucdavis.edu),  
4 Negeen Najafi<sup>a</sup> (nnajafi@ucdavis.edu), Maria Gonzalez<sup>a</sup> (mdcgonzalez@ucdavis.edu), Abigail  
5 Pfefferlen<sup>a</sup> (apfefferlen@ucdavis.edu), Vannesa DeAnda<sup>a</sup> (vndeanda@ucdavis.edu), David W.  
6 Ginsburg<sup>b</sup> (dginsbur@usc.edu); Maddelyn C. Harden<sup>c</sup> (mharden@usc.edu), Sergey V. Nuzhdin<sup>c</sup>  
7 (snuzhdin@usc.edu), Joan King Salwen<sup>d</sup> (jsalwen@stanford.edu), Ermias Kebreab<sup>a</sup>  
8 (ekebreab@ucdavis.edu), and Matthias Hess<sup>a</sup> (mhess@ucdavis.edu).

9

10 <sup>a</sup>Department of Animal Science, University of California, One Shields Avenue, Davis, CA,  
11 95616, USA

12 <sup>b</sup>Dornsife College of Letters, Arts and Sciences, University of Southern California, 3454  
13 Trousdale Pkwy, CAS 116, Los Angeles, CA 90089, USA

14 <sup>c</sup>Dornsife College of Letters, Arts and Sciences, University of Southern California, 3551  
15 Trousdale Pkwy, Los Angeles, CA 90089, USA

16 <sup>d</sup>Department of Earth System Science, Stanford University, 450 Serra Mall, Stanford, CA, 94305  
17 USA

18 Corresponding author: Matthias Hess  
19 2251 Meyer Hall  
20 Department of Animal Science  
21 University of California, Davis  
22 Davis, CA 95616, USA  
23 P (530) 530-752-8809

24 F (530) 752-0175

25 mhess@ucdavis.edu

26

27 **Conflict of interest:** The authors declare to have no conflict of interest.

28 **Funding:** Any opinions, findings, conclusions, or recommendations expressed in this publication  
29 are those of the author(s). This work was supported through funds from the College of  
30 Agricultural and Environmental Sciences at the University of California, Davis, by Elm  
31 Innovations and by the Hellman Foundation. Maddelyn C. Harden was supported by ARPA-E  
32 (Contract# 1726-1513) and Sergey V. Nuzhdin was supported by a Wyatt Foundation gift.

33

34 **Abstract:**

35 With increasing interest in feed based methane mitigation strategies, fueled by local legal  
36 directives aimed at methane production from the agricultural sector in California, identifying  
37 local sources of biological feed additives will be critical in keeping the implementation of these  
38 strategies affordable. In a recent study, the red alga *Asparagopsis taxiformis* stood out as the  
39 most effective species of seaweed to reduce methane production from enteric fermentation. Due  
40 to the potential differences in effectiveness based on the location from where *A. taxiformis* is  
41 collected and the financial burden of collection and transport, we tested the potential of *A.*  
42 *taxiformis*, as well as the brown seaweed *Zonaria farlowii* collected in the nearshore waters off  
43 Santa Catalina Island, CA, USA, for their ability to mitigate methane production during *in-vitro*  
44 rumen fermentation. At a dose rate of 5% dry matter (DM), *A. taxiformis* reduced methane  
45 production by 74% ( $p \leq 0.01$ ) and *Z. farlowii* reduced methane production by 11% ( $p \leq 0.04$ )  
46 after 48 hours and 24 hours of *in-vitro* rumen fermentation respectively. The methane reducing

47 effect of *A. taxiformis* and *Z. farlowii* described here make these local macroalgae promising  
48 candidates for biotic methane mitigation strategies in the largest milk producing state in the US.  
49 To determine their real potential as methane mitigating feed supplements in the dairy industry,  
50 their effect *in-vivo* requires investigation.

51

52 **Key Words:** *Asparagopsis taxiformis*, *Zonaria farlowii* , feed supplementation, greenhouse gas  
53 mitigation, *in-vitro* rumen fermentation, macroalgae

54

55

56

## 57 **1. Introduction**

58 Methane (CH<sub>4</sub>) accounts for more than 10% of the greenhouse gas (GHG) emissions from the  
59 US (Myhre, 2013) and enteric fermentation from ruminant animals accounts for approximately  
60 25% of the total anthropogenically produced methane (NASEM, 2018). Thus, efficient  
61 strategies to lower enteric CH<sub>4</sub> production could result in a significantly reduced carbon footprint  
62 from agriculture and animal production more specifically.

63 *In-vitro* studies have demonstrated that some brown and red macroalgae can inhibit  
64 microbial methanogenesis (Machado, 2014) and they have been suggested as feed supplements  
65 to reduce methanogenesis during enteric fermentation (Machado, 2016; Dubois, 2013; Wang,  
66 2008). In addition to its methane reducing affect, utilization of these macroalgae could promote  
67 higher growth rates and feed conversion efficiencies in ruminants via the potential net energy  
68 yield from the redistribution of energy from the microbial methanogenesis pathway, into more  
69 favorable pathways (i.e volatile fatty acids) (Hansen, 2003; Marín, 2009). Therefore, macroalgae

70 feed supplementation may be an effective strategy to simultaneously improve profitability and  
71 sustainability of beef and dairy operations.

72 In a recent study (Machado et al. 2014), the red alga *Asparagopsis taxiformis* stood out as  
73 the most effective species of seaweed to reduce methane production. In this work, the effect of a  
74 large variety of macroalgal species including freshwater, green, red and brown algae on CH<sub>4</sub>  
75 production during *in-vitro* incubation were compared and the obtained results showed that *A.*  
76 *taxiformis* amendment yielded the most significant reduction (~98.9%) of CH<sub>4</sub> production.

77 A major barrier to the implementation of an *A. taxiformis* based methane mitigation  
78 strategy is the availability of the seaweed, which has led to the exploration of alternative seaweed  
79 species. Previous investigations have collected *A. taxiformis* during diving excursions off the  
80 coast of Australia. Due to the potential differences in effectiveness based on the location and  
81 growing conditions from which the seaweed is collected and the financial burden of transport,  
82 we tested the potential of two different species of subtidal macroalgae (*A. taxiformis* and the  
83 brown alga, *Zonaria farlowii*) from Southern California for their ability to mitigate methane  
84 production during *in-vitro* rumen fermentation.

85

## 86 **2. Materials and Methods**

### 87 **2.1 Experimental Design**

88 To determine the effect of two locally sourced macroalgae species on methane production during  
89 *in-vitro* rumen fermentation, *Asparagopsis taxiformis* and *Zonaria farlowii* were supplemented  
90 to an *in-vitro* gas production system at a dose rate of 5% DM. Rumen fluid was diluted 3-fold  
91 with artificial saliva buffer (Oeztuerk et al., 2015). After homogenization, 200 ml of the mixture  
92 was allocated to 300 ml vessels fitted with Ankom head units (Ankom Technology RF Gas

93 Production System, Macedon, NY, USA). Each vessel received 2 g of rumen solids, and 2 g of a  
94 basic ration (Super basic ration — SBR, Table 1) commonly used in the dairy industry in  
95 California. Rumen solids and SBR were sealed in separate Ankom feed bags and seaweed was  
96 included in the respective SBR feed bags (Ankom, Macedon, NY). Vessels were placed in a  
97 shaking water bath (39°C) and incubated while mixed at 40 rpm. Foil gas bags (Restek, USA)  
98 were connected to the Ankom head units to collect gas at 24 and 48 hours respectively.

99

## 100 **2.2 Pacific Coast Seaweed Collection and Preparation**

101 *Asparagopsis taxiformis* and *Z. farlowii* were collected from Little Fisherman's Cove on the  
102 leeward side of Santa Catalina Island, ~35 km off the coast of Southern California, USA (Figure  
103 1). The seaweed was shipped on ice to the University of California, Davis, where it was dried at  
104 55°C for 72 hours and ground through a 2 mm Wiley Mill (Thomas Scientific, Swedesboro, NJ).

105

## 106 **2.3 Rumen Fluid Collection**

107 All animal procedures were performed in accordance with the Institution of Animal Care and  
108 Use Committee (IACUC) at University of California, Davis under protocol number 19263.  
109 Rumen content was collected from a rumen fistulated Holstein cow, housed at the UC Davis  
110 Dairy Research and Teaching Facility Unit. The rumen fluid donor was fed a dry cow total  
111 mixed ration (50% wheat hay, 25% alfalfa hay/manger cleanings, 21.4% almond hulls, and 3.6%  
112 mineral pellet, Table 1). Two liters of rumen fluid and 30 g of rumen solids were collected 90  
113 min after morning feeding. Rumen content was collected via transphonation using a perforated  
114 PVC pipe, 500 mL syringe, and Tygon tubing (Saint-Gobain North America, PA, USA). Fluid

115 was strained through a colander and 4 layers of cheesecloth into a 4 L pre-warmed, vacuum  
116 insulated container and transported to the laboratory.

117

#### 118 **2.4 Greenhouse Gas Analysis**

119 Methane and CO<sub>2</sub> were measured from gas bags using an SRI Gas Chromatograph (8610C, SRI,  
120 Torrance, CA) fitted with a 3'x1/8" stainless steel Haysep D column and a flame ionization  
121 detector (FID) with methanizer . The oven temperature was held at 90°C for 5 minutes. Carrier  
122 gas was high purity hydrogen at a flow rate of 30 ml/min. The FID was held at 300°C. A 1 mL  
123 sample was injected directly onto the column. Calibration curves were developed with Airgas  
124 certified CH<sub>4</sub> and CO<sub>2</sub> standard (Airgas, USA).

125

#### 126 **2.5 Statistical Analysis**

127 Differences in CH<sub>4</sub> and CO<sub>2</sub> production were determined using unpaired parametric t-tests with  
128 Welch's correction conducted in Graphpad Prism 7 (Graphpad software Inc, La Jolla, CA).  
129 Significant differences among treatments were declared at  $p \leq 0.05$ .

130

**Table 1.** Composition of dry cow diet and super basic ration (SBR).

| Dry Cow Diet |     | SBR                    |     |
|--------------|-----|------------------------|-----|
| Ingredient   |     |                        |     |
| Alfalfa      | 25% | Alfalfa                | 70% |
| Wheat        | 50% | Dried distillers grain | 15% |

|                 |        |             |     |
|-----------------|--------|-------------|-----|
| Almond hulls    | 21.40% | Rolled corn | 15% |
| Mineral pellets | 3.60%  |             |     |

---

131

### 132 **3. Results**

#### 133 **3.1 Gas production profile of *in vitro* fermentation of rumen fluid amended with 5% *A.***

##### 134 *taxiformis*

135 At a dose rate of 5% DM, *A. taxiformis* reduced methane production by 74% after 48 hours of *in-*  
136 *vitro* rumen fermentation ( $p \leq 0.01$ , Figure 2B) and daily methane production remained nearly  
137 identical in the presence of *A. taxiformis* on both days ( $7.1 \pm 1.9$  ml (g DM)<sup>-1</sup> and  $6.6 \pm 2.5$  ml (g  
138 DM)<sup>-1</sup> after 24 and 48 hours respectively). Methane production in the control vessels increased  
139 by 76% after 48 hours of incubation ( $20.3 \pm 11$  ml (g DM)<sup>-1</sup> and  $35.5 \pm 8.5$  ml (g DM)<sup>-1</sup> at 24  
140 and 48 hours respectively).

141 While methane production varied with 5% DM inclusion of *A. taxiformis*, CO<sub>2</sub>  
142 production remained similar between treatment ( $41.9 \pm 6.2$  ml (g DM)<sup>-1</sup> and  $65.23 \pm 9.1$  ml (g  
143 DM)<sup>-1</sup> at 24 and 48 hours respectively) and control vessels ( $47.4 \pm 13.4$  ml (g DM)<sup>-1</sup> and  
144  $69.0 \pm 15.9$  ml (g DM)<sup>-1</sup> at 24 and 48 hours respectively).

145

#### 146 **3.2 Gas production profile of *in vitro* fermentation of rumen fluid amended with 5% *Z.***

##### 147 *farlowii*

148 At a dose rate of 5% DM, *Z. farlowii* reduced methane production by 11% after 24 hours of *in*  
149 *vitro* rumen fermentation ( $p \leq 0.04$ , Figure 3A). Daily methane production decreased slightly at  
150 48 hours compared to 24 hours of incubation for both the control and treatment vessels (Control

151 =  $62.5 \pm 3.3$  ml (g DM)<sup>-1</sup> and  $51.4 \pm 2.9$  ml (g DM)<sup>-1</sup> CH<sub>4</sub>, at 24 and 48 hours respectively;  
152 treatment =  $55.3 \pm 2.7$  and  $45.9 \pm 3.7$  ml (g DM)<sup>-1</sup> CH<sub>4</sub>, at 24 and 48 hours respectively).

153 While methane production decreased slightly for all vessels at 48 hours, CO<sub>2</sub> production  
154 nearly doubled (Control =  $74.1 \pm 7.7$  ml (g DM)<sup>-1</sup> and  $117.9 \pm 14.6$  ml (g DM)<sup>-1</sup> CO<sub>2</sub>, at 24  
155 and 48 hours respectively; treatment =  $67.6 \pm 4.1$  ml (g DM)<sup>-1</sup> and  $114.2 \pm 6.0$  ml (g DM)<sup>-1</sup>  
156 CO<sub>2</sub>, at 24 and 48 hours respectively). Carbon dioxide production from vessels amended with  
157 5% DM of *Z. farlowii* did not differ from the control vessels at 24 or 48 hours ( $p \leq 0.27$  and  $p \leq$   
158  $0.70$  respectively).

159

#### 160 **4. Discussion**

161 With increasing interest in feed-based biotic methane mitigation strategies fueled by legal  
162 directives aimed at reducing methane production from the agricultural sector, identification of  
163 local biotic feed-supplements will be critical to render large-scale methane mitigation strategies  
164 economical.

165 The data presented here suggest that subtidal macroalgae from Santa Catalina Island,  
166 Southern California reduced the *in-vitro* production of CH<sub>4</sub> when added to rumen content from  
167 California dairy cattle, suggesting that California seaweed might represent a viable option for use  
168 in feed based methane mitigation strategies. In addition to demonstrating the potential of the  
169 local *A. taxiformis* for methane mitigation during enteric fermentation, we also demonstrated  
170 significant methane reduction in the brown alga *Z. farlowii*, a species of seaweed commonly  
171 found along the Southern California Bight, without obvious impact on CO<sub>2</sub> production (Figures 2  
172 and 3, panels A and B).



173           The effectiveness of a macroalgae in reducing methane production during rumen  
174 incubation has been linked to the concentration of halogenated bioactives including bromoform  
175 and di-bromochloromethane (Machado, 2016). However, in contrast to *A. taxiformis*, which has  
176 been shown to produce several halomethane compounds, *Z. farlowii* amendment only reduced  
177 methane on a short time scale. These findings suggest that either the bioactives in *Z. farlowii* are  
178 more bioavailable but less effective or concentrated, or methane reduction is occurring via a  
179 different compound or a different mode of action. Previous studies have identified multiple  
180 phenolic lipids produced by *Z. farlowii* from Southern California waters as possessing  
181 antimicrobial activity (Gerwick and Fenical, 1981). However, the reduction of methane in  
182 vessels amended with *Z. farlowii* was modest compared to those amended with *A. taxiformis*.  
183 *Zonaria farlowii* is commonly found along the Southern California Bight, which makes it a  
184 potential candidate for non-terrestrial farming operations along the Southern California Coast. A  
185 more in-depth nutrient analysis of *Z. farlowii* along with *in-vitro* assays will be essential to help  
186 determine its value for future methane mitigation strategies and to determine its potential for use  
187 in dairy operations.

188

## 189 **5. Conclusion**

190 *Asparagopsis taxiformis* and *Z. farlowii* collected off Santa Catalina Island were evaluated for  
191 their ability to reduce methane production from dairy cattle fed a mixed ration widely utilized in  
192 California. The methane reducing effect of the *A. taxiformis* and *Z. farlowii* described in this  
193 study makes these macroalgae promising candidates for biotic methane mitigation strategies in  
194 the largest milk producing state in the US. With expected growth in livestock production, it is

195 necessary to investigate and confirm the effect of these macroalgae *in-vivo*, in order to ensure  
196 that farmers have sufficient incentive to implement such strategies.

197

## 198 **6. References**

199 Myhre G, Shindell D, Bréon F-M, Collins W, Fuglestvedt J, Huang J, Koch D, Lamarque J.-F,  
200 Lee D, Mendoza B, Nakajima T, Robock A, Stephens G, Takemura T, Zhang H. Anthropogenic  
201 and Natural Radiative Forcing. 2013 In: Climate Change: The Physical Science Basis.  
202 Contribution of Working Group I to the Fifth Assessment Report of the Intergovernmental Panel  
203 on Climate. Cambridge University Press, Cambridge, United Kingdom and New York, NY,  
204 USA. 2013. [https://www.ipcc.ch/pdf/assessment-](https://www.ipcc.ch/pdf/assessment-report/ar5/wg1/WG1AR5_Chapter08_FINAL.pdf)  
205 [report/ar5/wg1/WG1AR5\\_Chapter08\\_FINAL.pdf](https://www.ipcc.ch/pdf/assessment-report/ar5/wg1/WG1AR5_Chapter08_FINAL.pdf). Accessed 15 March 2018.

206

207 National Academies of Science Engineering and Medicine (NASEM). Improving  
208 Characterization of Anthropogenic Methane Emissions in the United States. The National  
209 Academies Press, Washington, DC. 2018. <https://www.nap.edu/read/24987>. Accessed 15 March  
210 2018

211

212 Machado L, Magnusson M, Paul NA, de Nys R, Tomkins N. Effects of Marine and Freshwater  
213 Macroalgae on In-Vitro Total Gas and Methane Production. PLOS ONE 2014;9:e85289

214

215 Machado L, Magnusson M, Paul NA, Kinley R, de Nys R, Tomkins N. Dose-response effects of  
216 *Asparagopsis taxiformis* and *Oedogonium* sp. on in-vitro fermentation and methane production. J  
217 Appl Phycol. 2016;28:1443-1452.

218

219 Dubois B, Tomkins NW, Kinley RD, Bai M, Seymour S, Paul NA, de Nys R. Effect of tropical  
220 algae as additives on rumen in-vitro gas production and fermentation characteristics. *Am J Plant*  
221 *Sci* 2013;4:34-43.

222

223 Wang Y, Xu Z, Bach S, McAllister T. Effects of phlorotannins from *Ascophyllum nodosum*  
224 (brown seaweed) on in-vitro ruminal digestion of mixed forage or barley grain. *Anim Feed Sci*  
225 *Tech* 2008;145:375-395.

226

227 Hansen H, Hector B, Feldmann J. A qualitative and quantitative evaluation of the seaweed diet  
228 of North Ronaldsay sheep. *Anim Feed Sci Tech.* 2003;105:21-28.

229

230 Marín A, Casas-Valdez M, Carrillo S, Hernández H, Monroy A, Sanginés L, Pérez-Gil F. The  
231 marine algae *Sargassum* spp. (Sargassaceae) as feed for sheep in tropical and subtropical regions.  
232 *Rev Biol Tropic.* 2009;57:1271-1281.

233

234 Oeztuerk H, Schroeder B, Beyerbach M, Breves G. Influence of living and autoclaved yeasts of  
235 *Saccharomyces boulardii* on in-vitro ruminal microbial metabolism. *J Dairy Sci.* 2005;88:2594-  
236 2600.

237

238 Gerwick, W. and Fenical, W. Phenolic lipids from related marine algae of the order Dictyotales.  
239 *Phytochemistry*, 1982: 21:633-637.

240

241 **Figure 1. Map showing the location of Santa Catalina Island relative to the Southern**  
242 **California mainland.** Inset: The red alga *Asparagopsis taxiformis* (A) and the brown alga  
243 *Zonaria farlowii* (B) were collected (2-5 m depth) in Little Fisherman's Cove, located ~0.6 km  
244 from the USC Wrigley Marine Science Center.

245

246 **Figure 2. Methane and CO<sub>2</sub> production during *in-vitro* fermentation of rumen fluid**  
247 **amended with *A. taxiformis*.** Production of CH<sub>4</sub> [ml (g DM)<sup>-1</sup>] and CO<sub>2</sub> [ml (g DM)<sup>-1</sup>]  
248 from vessels without (n=4) and with 5% (n=4) *A. taxiformis* as additive. Methane and CO<sub>2</sub> were  
249 measured at 24 h (A & B respectively) and 48 h (C & D respectively). “\*” indicate significant  
250 difference ( $p$  value  $\leq 0.05$ ), “ns” indicates not significant. Error bars represent the standard error  
251 from the mean.

252

253 **Figure 3. Methane and CO<sub>2</sub> production during *in-vitro* fermentation of rumen fluid**  
254 **amended with *Z. farlowii*.** Production of CH<sub>4</sub> [ml (g DM)<sup>-1</sup>] and CO<sub>2</sub> [ml (g DM)<sup>-1</sup>] from  
255 vessels without (n=3) and with 5% (n=3) *Z. farlowii* as additive. Methane and CO<sub>2</sub> were  
256 measured at 24 h (A & B respectively) and 48 h (C & D respectively). “\*” indicate significant  
257 difference ( $p$  value  $\leq 0.05$ ), “ns” indicates not significant. Error bars represent the standard error  
258 from the mean.

259

118° 30' W

SAN PEDRO

SOUTHERN CALIFORNIA MAINLAND

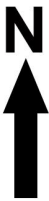

California

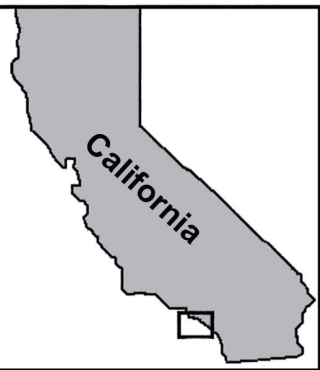

30° 30' N

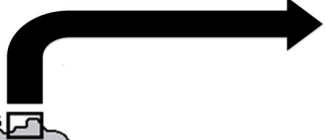

SANTA CATALINA IS.

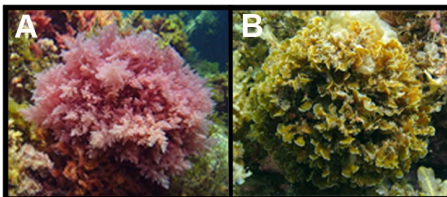

Little Fisherman's Cove

USC Wrigley Marine Science Center

5 km 10 km

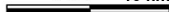

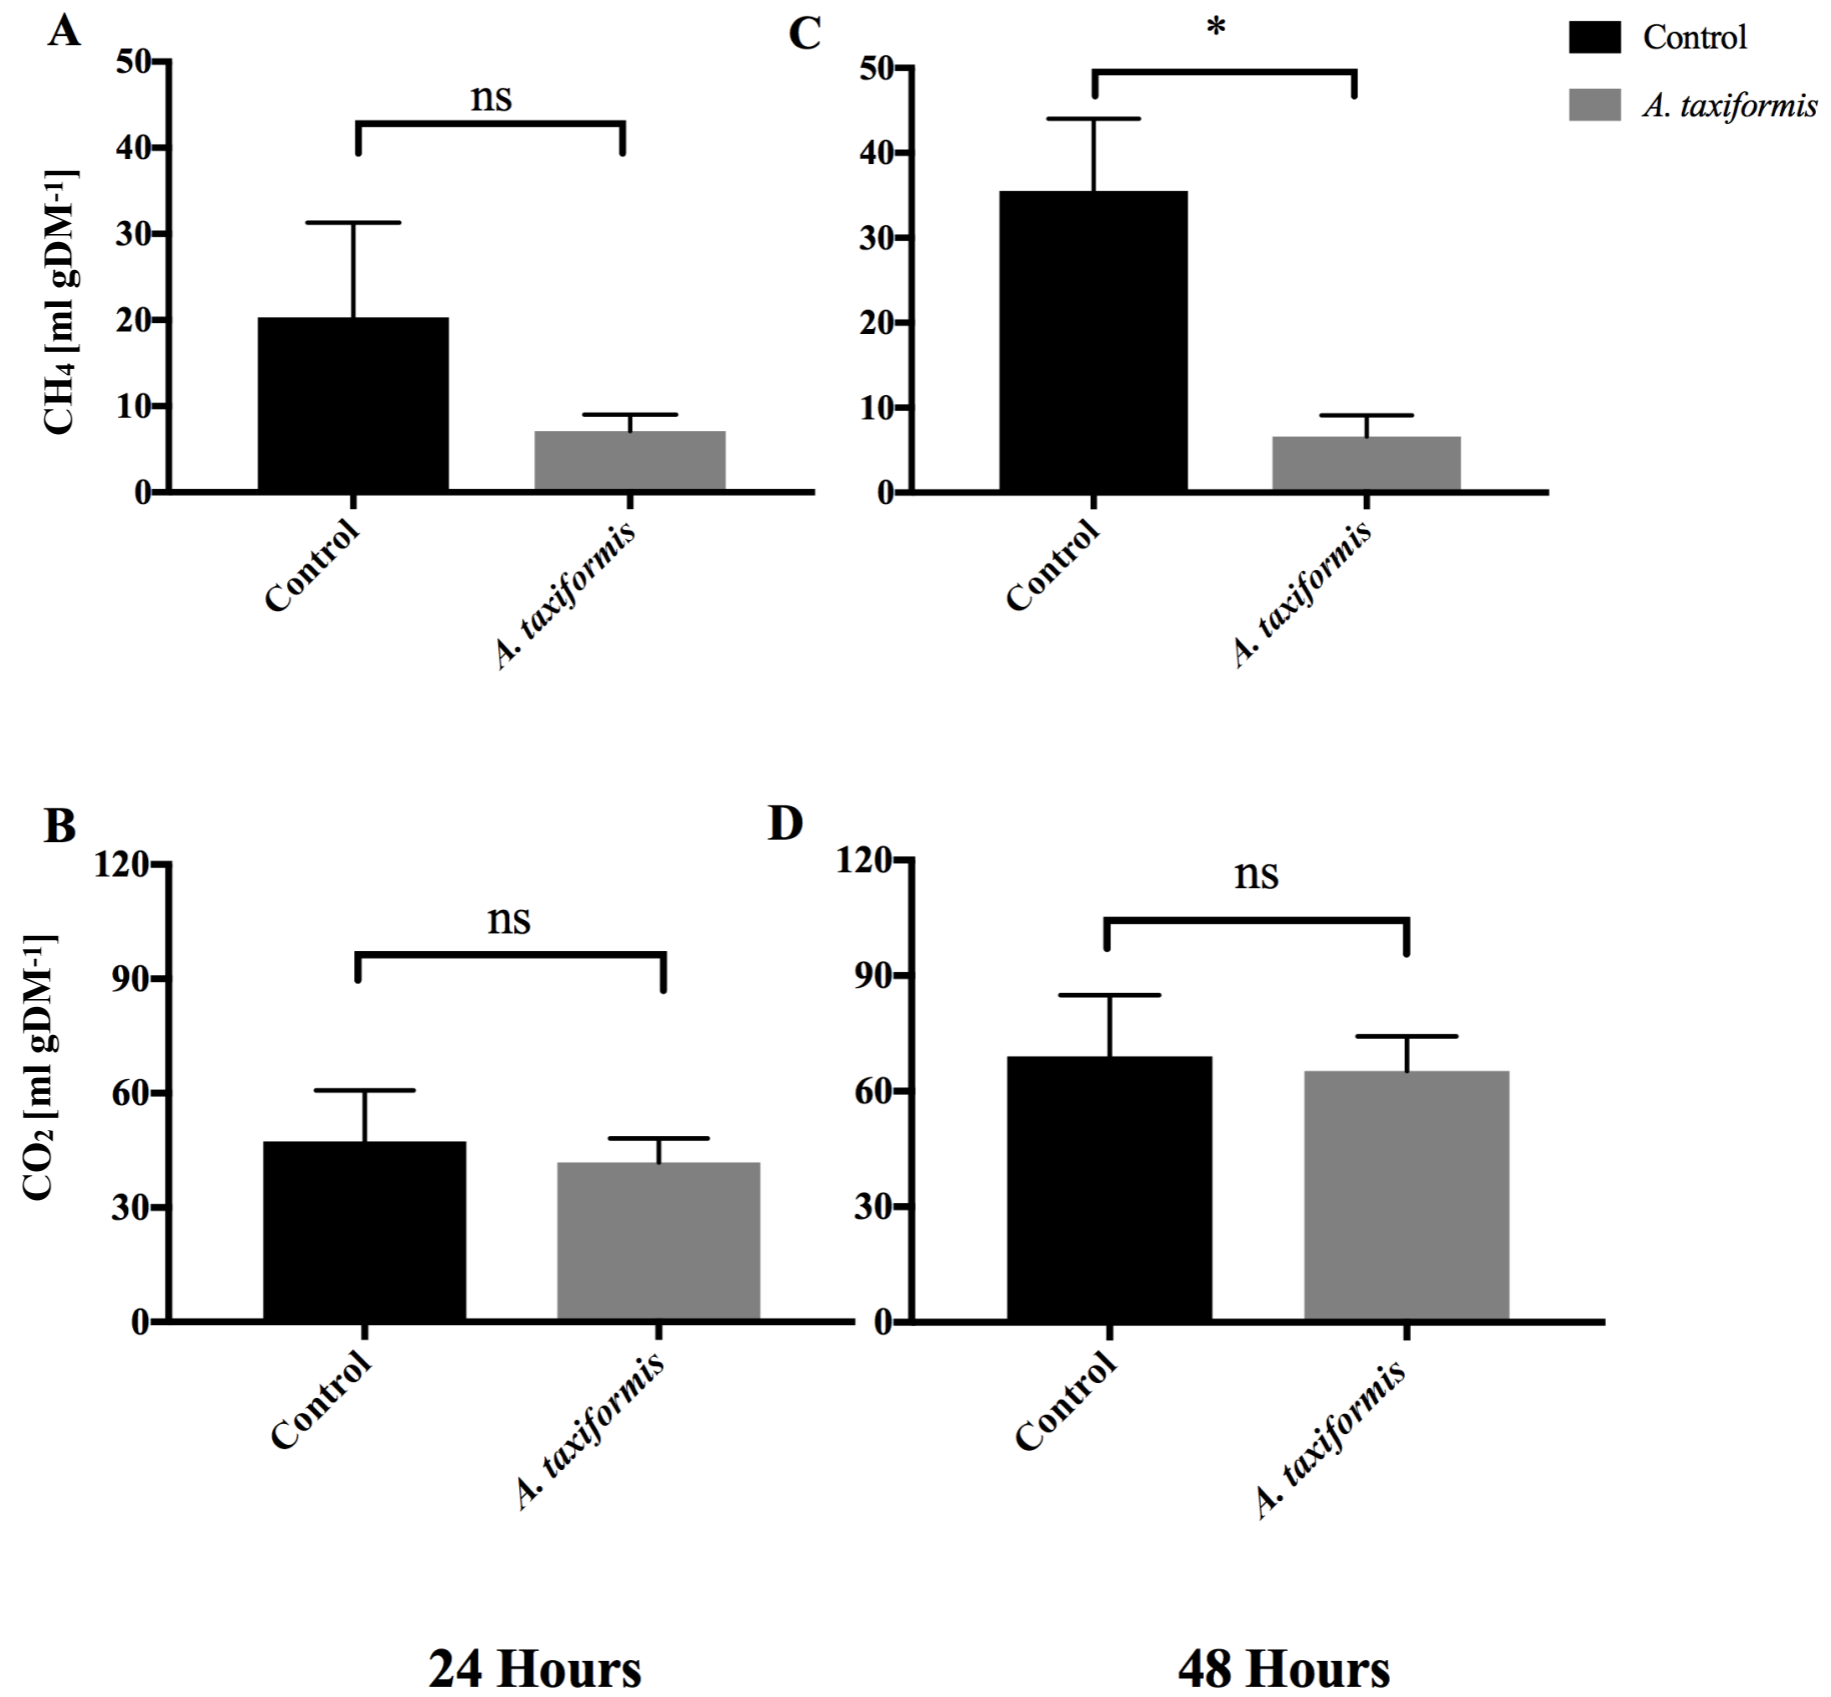

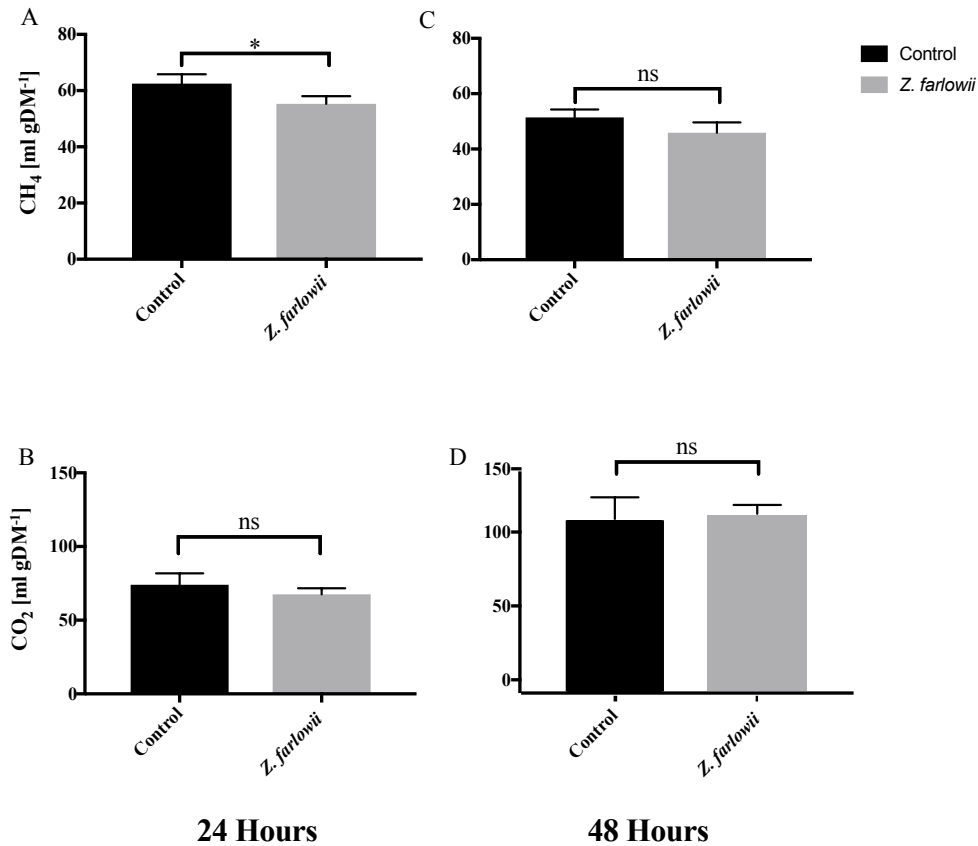

Source: https://www.biorxiv.org/content/biorxiv/early/2018/10/05/434480.full.pdf
